# Supplementary material for: GWAS Links New Variant in Long Non-Coding RNA LINC02006 with Colorectal Cancer Susceptibility
Source: MDPI journal article supplement (doi:10.3390/biology10060465), 2021-05-25
Supplement: s1 [file s1]

**Table S2.** The significant allelic association of GWAS-selected SNPs with colorectal cancer parameters.

| Compared groups (N)                | dbSNP ID <sup>a</sup> | Region           | OR (95% CI)      | p-value               | <i>p<sub>adj</sub></i> -value |
|------------------------------------|-----------------------|------------------|------------------|-----------------------|-------------------------------|
| G2 (284) vs. control (1079)        | rs17575184            | <i>NEGR1</i>     | 0.59 (0.41-0.84) | 4.53×10 <sup>-3</sup> | <b>7.55×10<sup>-3</sup></b>   |
|                                    | rs10935945            | <i>LINC02006</i> | 1.47 (1.22-1.77) | 4.40×10 <sup>-5</sup> | <b>2.20×10<sup>-4</sup></b>   |
|                                    | rs11060839            | <i>PIWIL1</i>    | 1.37 (1.08-1.73) | 8.58×10 <sup>-3</sup> | <b>3.92×10<sup>-4</sup></b>   |
|                                    | rs9927668             | intergenic       | 0.69 (0.56-0.84) | 2.00×10 <sup>-4</sup> | <b>4.90×10<sup>-4</sup></b>   |
|                                    | rs12935896            | <i>BCAS3</i>     | 0.78 (0.62-0.97) | 3.00×10 <sup>-2</sup> | <b>3.00×10<sup>-2</sup></b>   |
| G3 (42) vs. control (1079)         | rs11060839            | <i>PIWIL1</i>    | 2.06 (1.22-3.37) | 4.34×10 <sup>-3</sup> | <b>2.17×10<sup>-2</sup></b>   |
|                                    | rs12935896            | <i>BCAS3</i>     | 0.49 (0.25-0.88) | 2.06×10 <sup>-2</sup> | 5.14×10 <sup>-2</sup>         |
| T3 (277) vs. control (1079)        | rs17575184            | <i>NEGR1</i>     | 0.63 (0.43-0.88) | 8.45×10 <sup>-3</sup> | <b>1.06×10<sup>-2</sup></b>   |
|                                    | rs10935945            | <i>LINC02006</i> | 1.35 (1.12-1.63) | 1.63×10 <sup>-3</sup> | <b>2.71×10<sup>-3</sup></b>   |
|                                    | rs11060839            | <i>PIWIL1</i>    | 1.48 (1.16-1.87) | 1.12×10 <sup>-3</sup> | <b>2.71×10<sup>-3</sup></b>   |
|                                    | rs9927668             | intergenic       | 0.70 (0.57-0.85) | 4.40×10 <sup>-4</sup> | <b>2.28×10<sup>-3</sup></b>   |
|                                    | rs12935896            | <i>BCAS3</i>     | 0.77 (0.61-0.96) | 2.22×10 <sup>-2</sup> | <b>2.22×10<sup>-2</sup></b>   |
| T4 (56) vs. control (1079)         | rs10935945            | <i>LINC02006</i> | 2.04 (1.39-3.02) | 2.37×10 <sup>-4</sup> | <b>1.18×10<sup>-3</sup></b>   |
| N0 (245) vs. control (1079)        | rs10935945            | <i>LINC02006</i> | 1.46 (1.20-1.78) | 1.42×10 <sup>-4</sup> | <b>7.10×10<sup>-4</sup></b>   |
|                                    | rs11060839            | <i>PIWIL1</i>    | 1.36 (1.06-1.74) | 1.56×10 <sup>-2</sup> | <b>2.42×10<sup>-2</sup></b>   |
|                                    | rs9927668             | intergenic       | 0.75 (0.61-0.93) | 7.79×10 <sup>-3</sup> | <b>1.95×10<sup>-2</sup></b>   |
|                                    | rs12935896            | <i>BCAS3</i>     | 0.75 (0.59-0.95) | 1.93×10 <sup>-2</sup> | <b>2.42×10<sup>-2</sup></b>   |
| N2 (78) vs. control (1079)         | rs10935945            | <i>LINC02006</i> | 1.69 (1.22-2.35) | 1.63×10 <sup>-3</sup> | <b>8.13×10<sup>-3</sup></b>   |
|                                    | rs9927668             | intergenic       | 0.68 (0.47-0.97) | 3.37×10 <sup>-2</sup> | 8.42×10 <sup>-2</sup>         |
| RC (173) vs. control (1079)        | rs17575184            | <i>NEGR1</i>     | 0.48 (0.29-0.76) | 2.28×10 <sup>-3</sup> | <b>5.70×10<sup>-3</sup></b>   |
|                                    | rs10935945            | <i>LINC02006</i> | 1.59 (1.27-2.00) | 5.61×10 <sup>-5</sup> | <b>2.80×10<sup>-4</sup></b>   |
| Metastasis (49) vs. control (1079) | rs11060839            | <i>PIWIL1</i>    | 1.81 (1.10-2.88) | 1.38×10 <sup>-2</sup> | 5.30×10 <sup>-2</sup>         |
|                                    | rs9927668             | intergenic       | 0.59 (0.37-0.92) | 2.12×10 <sup>-2</sup> | 5.30×10 <sup>-2</sup>         |
|                                    | rs12935896            | <i>BCAS3</i>     | 0.53 (0.29-0.91) | 3.18×10 <sup>-2</sup> | 5.30×10 <sup>-2</sup>         |

Allelic frequencies of all studied SNPs were in Hardy-Weinberg equilibrium. Bold denotes significant association after Benjamini-Hochberg algorithm adjustment (*p<sub>adj</sub>* < 0.05). RC; rectal cancer, OR; odds ratio, CI; confidence interval, G; grading, T; tumor size, N; lymph node status.

<sup>a/</sup> SNP identifier based on NCBI SNP database (<http://www.ncbi.nlm.nih.gov/snp/>).
