# Supplementary material for: GWAS Links New Variant in Long Non-Coding RNA LINC02006 with Colorectal Cancer Susceptibility
Source: MDPI journal article supplement (doi:10.3390/biology10060465), 2021-05-25

**Figure S3.** The Kaplan-Meier curves for the association of the expression levels of identified genes with survival probability in colorectal cancer patients, according to the *Human Protein Atlas* database.

**A. *PIWIL1***  $P = 0.083$

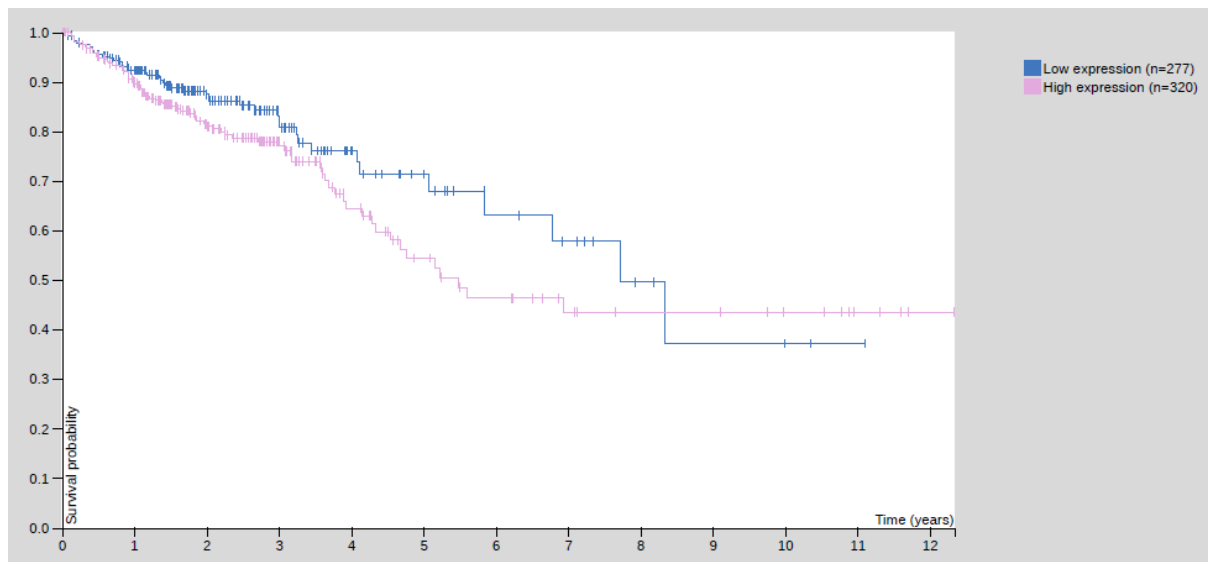

**B. *PIWIL1* (male)**  $P = 0.02$

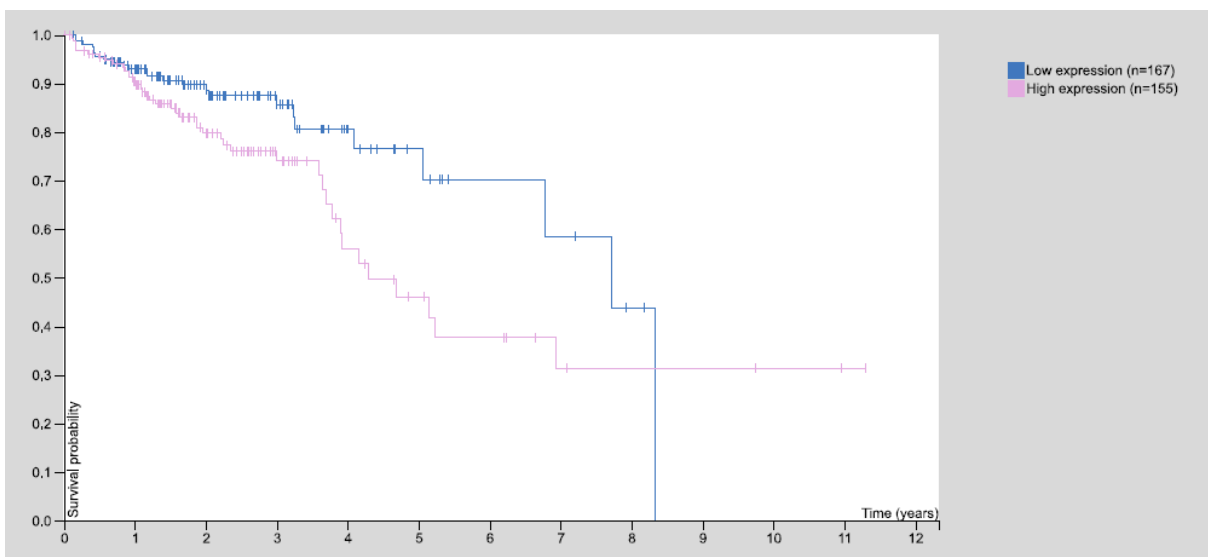

C. **NEGR1**

$P = 0.12$

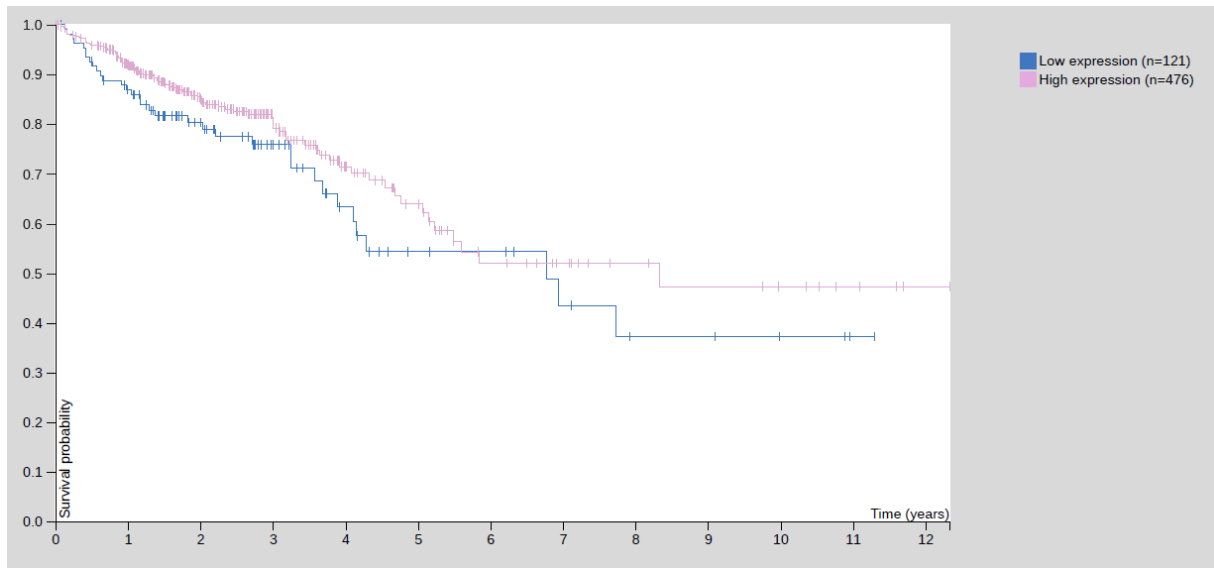

D. **NEGR1 (female)**

$P = 0.049$

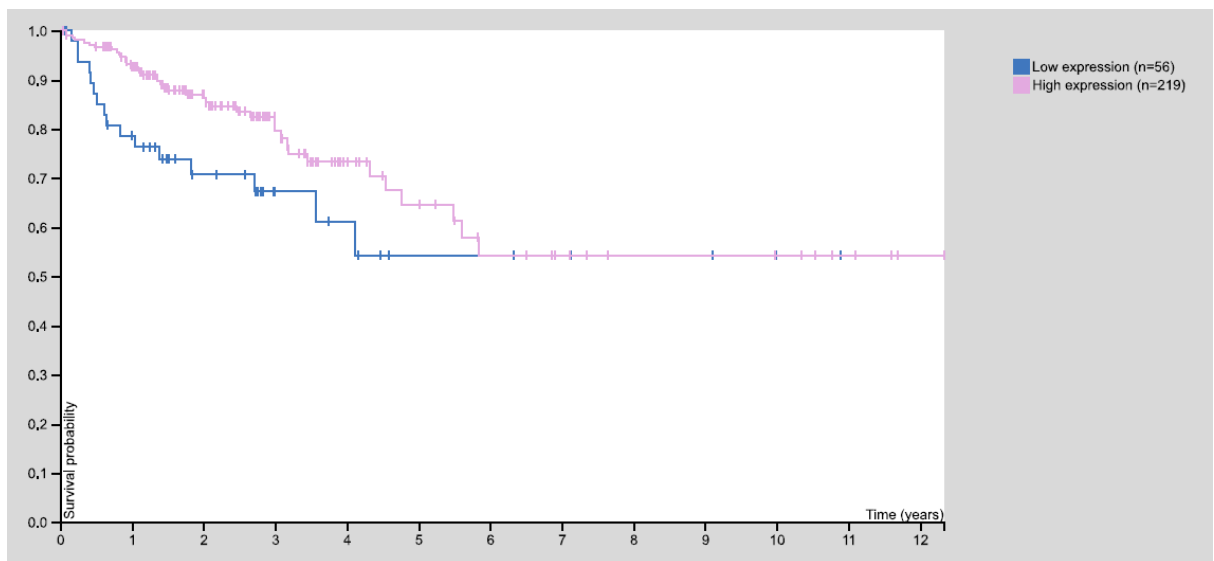

E. *BCAS3*

$P = 0.12$

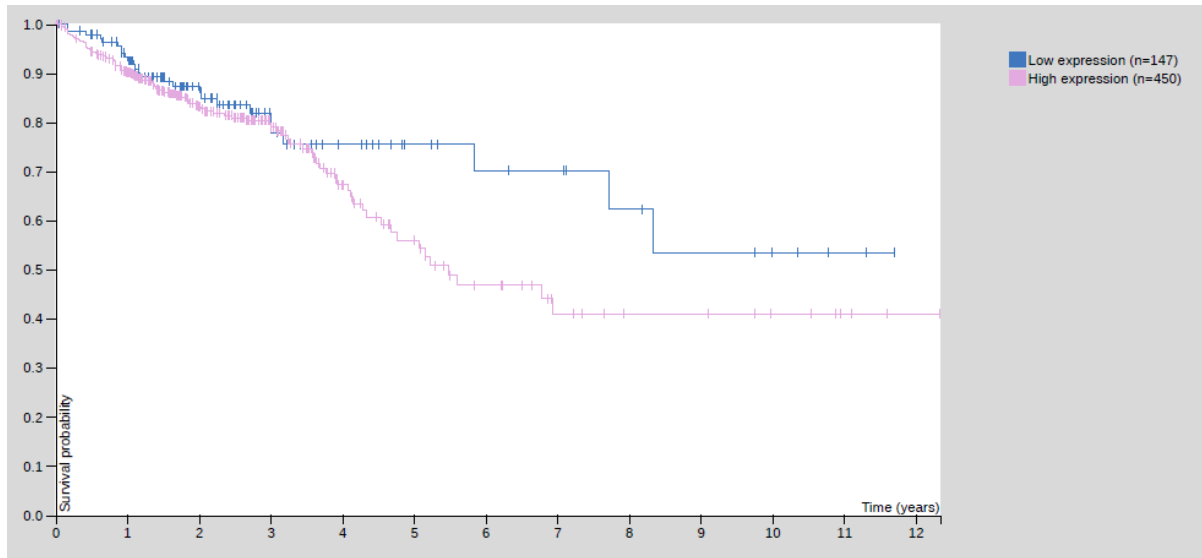

Supplement: s1 [file s1]
