# Supplementary material for: GWAS Links New Variant in Long Non-Coding RNA LINC02006 with Colorectal Cancer Susceptibility
Source: Biology (Basel). 2021 May 25;10(6):465. doi: 10.3390/biology10060465 (PMC8229782; doi:10.3390/biology10060465)
Supplement: Supplementary file 1 [file biology-10-00465-s001.zip]

Archive with 5 entries (5 files):
- Figure S1.tiff
- Figure S2.tiff
- Figure S3.pdf
- Table S1.xlsx
- Table S2.pdf
