# Supplementary material for: GWAS Links New Variant in Long Non-Coding RNA LINC02006 with Colorectal Cancer Susceptibility
Source: Biology (Basel). 2021 May 25;10(6):465. doi: 10.3390/biology10060465 (PMC8229782; doi:10.3390/biology10060465)
Supplement: Supplementary file 1 [file biology-10-00465-s001.zip › Table S1.xlsx]

## Sheet: p=0.05
Table S1. The power of study calculated for given minor allele frequency (first column) and odds ratio (second row).
		OR
MAF	1.2	1.5	1.8	2
0.05	0.094	0.329	0.636	0.799
0.1	0.143	0.555	0.887	0.969
0.2	0.223	0.790	0.985	0.999
0.3	0.277	0.876	0.996	1
0.4	0.307	0.904	0.997	1
0.5	0.314	0.905	0.997	1
Significance at p = 0.05. OR; odds ratio, MAF; minor allele frequency.
The study power over 80% is highlighted in pink.
